# Supplementary material for: Gastrointestinal Microbiome Dysbiosis in Infant Mice Alters Peripheral CD8+ T Cell Receptor Signaling
Source: PubMed Central journal article supplement (PMC5340779; doi:10.3389/fimmu.2017.00265), 2017-03-08
Supplement: Presentation_1.pdf [file Presentation_1.pdf]

## Supplementary Material

### Gastrointestinal microbiome dysbiosis in infant mice alters peripheral CD8<sup>+</sup> T cell receptor signaling

**Authors:** Gabriela Gonzalez-Perez<sup>1</sup> and Esi S.N. Lamoussé-Smith<sup>1\*</sup>,

<sup>1</sup>Division of Pediatric Gastroenterology, Hepatology and Nutrition, Department of Pediatrics, Columbia University Medical Center, New York, NY 10032

\*Correspondence: Corresponding Author [enl2118@cumc.columbia.edu](mailto:enl2118@cumc.columbia.edu)

Supplementary Figure 1

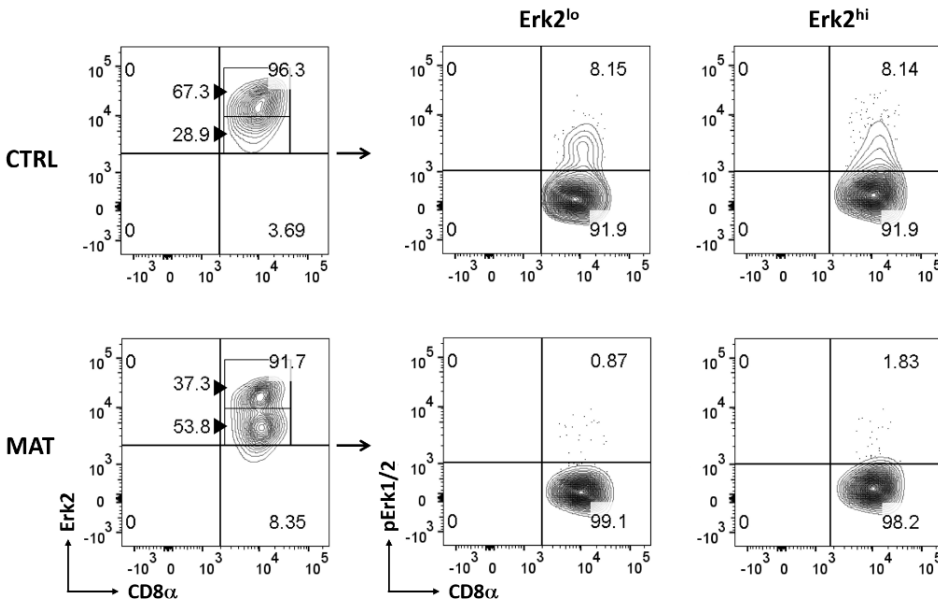

**Supplementary Figure 1. MAT effector CD8<sup>+</sup> T cells do not sustain phosphorylation of Erk-1/2.** Total T cells enriched from the spleens of uninfected dol 15 CTRL and MAT infant mice were stimulated with anti-CD3/anti-CD28 for 72 hours and effector (CD44<sup>+</sup>) CD8<sup>+</sup> T cells were analyzed for the expression of Erk2 and phospho-Erk-1/2 (pErk-1/2) by flow cytometry. The percentage of effector CD8<sup>+</sup> T cells expressing low or high levels of Erk2 (Erk2<sup>lo</sup> and Erk2<sup>hi</sup>, respectively) and the gating analysis of their corresponding pErk-1/2 expressing populations is shown. Data is representative of two independent experiments.

Supplementary Figure 2

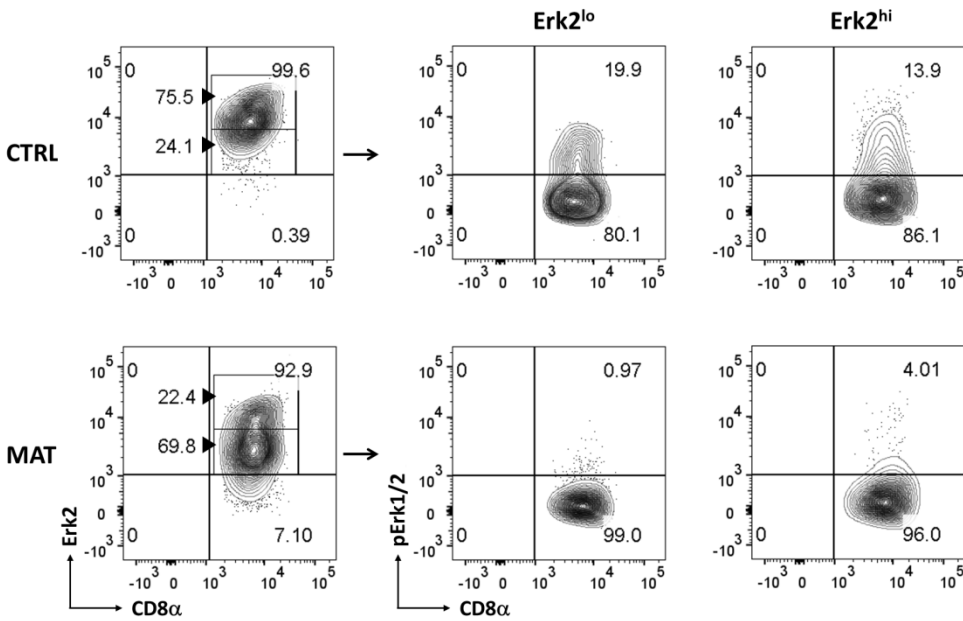

**Supplementary Figure 2. Purified MAT effector CD8<sup>+</sup> T cells do not sustain phosphorylation of Erk-1/2.** Total CD8<sup>+</sup> T cells purified from gender-matched pooled spleens of uninfected dol 15 CTRL and MAT infant mice were stimulated with anti-CD3/anti-CD28 for 72 hours and effector (CD44<sup>+</sup>) CD8<sup>+</sup> T cells were analyzed for the expression of Erk2 and phospho-Erk-1/2 (pErk-1/2) by flow cytometry. The percentage of effector CD8<sup>+</sup> T cells expressing low or high levels of Erk2 (Erk2<sup>lo</sup> and Erk2<sup>hi</sup>, respectively) and the gating analysis of their corresponding pErk-1/2 expressing populations is shown.

Supplementary Figure 3

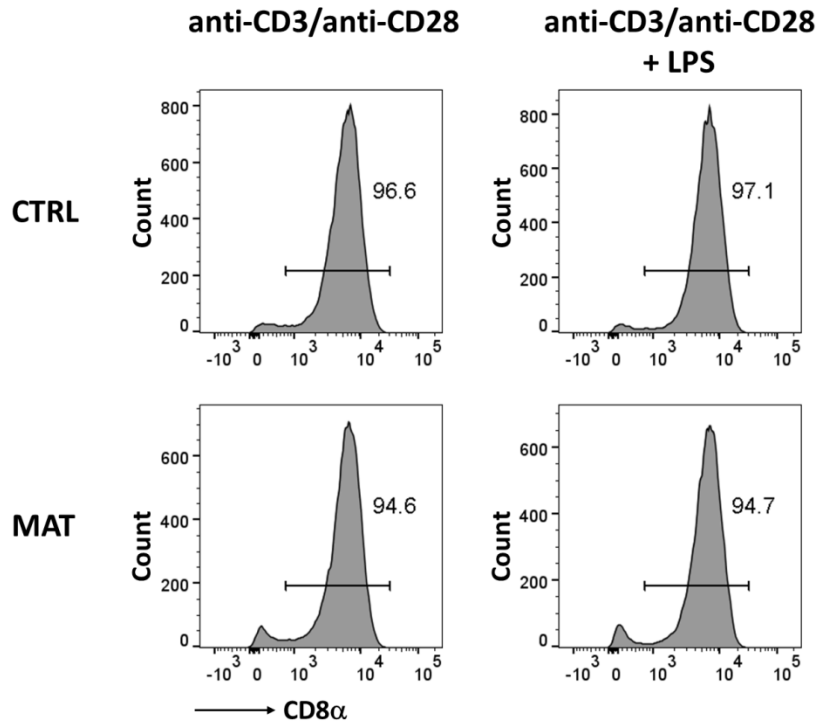

**Supplementary Figure 3. CD8 T cell purity from MAT and CTRL effector T cells generated *in vitro* with or without LPS.** Total CD8<sup>+</sup> T cells purified from gender-matched pooled spleens of uninfected dol 15 CTRL and MAT infant mice were stimulated with anti-CD3/anti-CD28 with or without *Escherichia coli*-derived LPS (1 µg/ml) for 72 hours. The percentage of CD8<sup>+</sup> T cells in these cultures is shown. Data is representative of three independent experiments.
